# Supplementary material for: Techniques to characterize dynamics in biomaterials microenvironments: XPCS and microrheology of alginate/PEO–PPO–PEO hydrogels
Source: Royal Society of Chemistry journal article supplement (doi:10.1039/d0sm01628d), 2020-12-10
Supplement: d0sm01628d1.pdf [file d0sm01628d1.pdf]

## Supporting Information for

### Techniques to Characterize Dynamics in Biomaterials Microenvironments:

#### XPCS and Microrheology of Alginate/PEO-PPO-PEO Hydrogels

Suan P. Quah,<sup>a</sup> Yugang Zhang,<sup>b</sup> Andrei Fluerasu,<sup>b</sup> Xiaoxi Yu,<sup>a</sup> Bingqian Zheng,<sup>a</sup> Xuechen Yin,<sup>a</sup>

Weiping Liu,<sup>a</sup> Surita R. Bhatia<sup>a,\*</sup>

<sup>a</sup>*Department of Chemistry, Stony Brook University, Stony Brook, NY 11794, USA*

<sup>b</sup>*NLSL-II, Brookhaven National Laboratory, Upton, NY 11973, USA*

\*Corresponding author: [Surita.bhatia@stonybrook.edu](mailto:Surita.bhatia@stonybrook.edu)

2 pages, 2 figures total

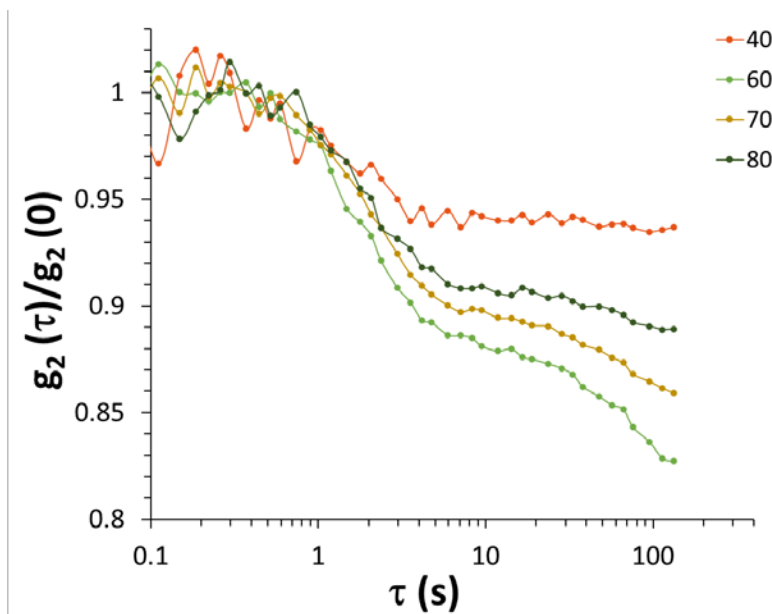

**Figure S1.** Normalized autocorrelation functions of alginate-F127 multicomponent hydrogel with 0.5 wt% alginate and 20 wt% F127 at different temperatures, measured at  $q = 7.59 \times 10^{-3} \text{ \AA}^{-1}$ .

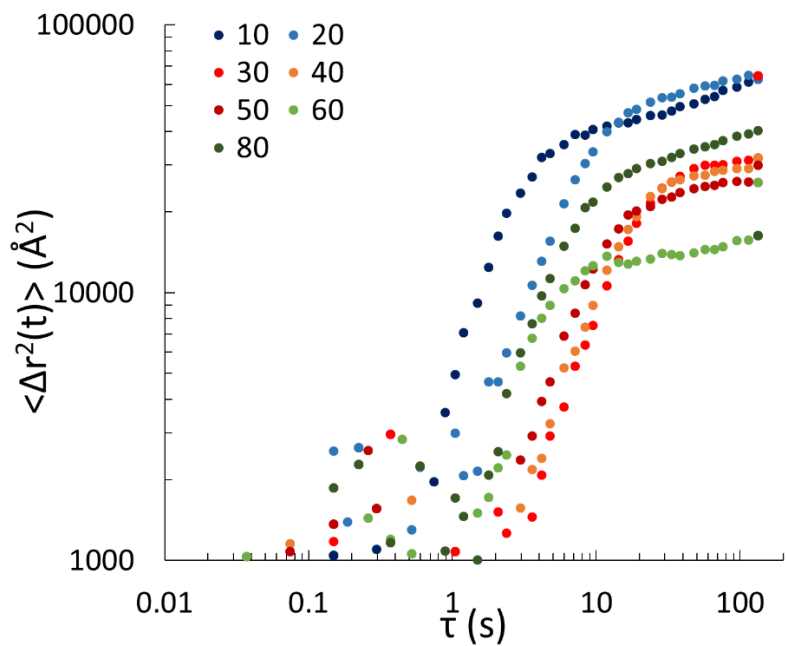

**Figure S2.** MSD of alginate-F127 multicomponent hydrogel with 0.5 wt% alginate and 30 wt% F127 at different temperatures, measured at  $q = 7.59 \times 10^{-3} \text{\AA}^{-1}$ .
